# Supplementary material
Source: ML conference proceedings conference paper supplement (https://openaccess.thecvf.com/content/CVPR2026/html/Xing_StereoWorld_Geometry-Aware_Monocular-to-Stereo_CVPR_2026_paper.html)
Supplement: Supplementary file 1 [file Ex.39226_supp.pdf › 39226_supp/Ex.39226_supp.pdf]

# StereoWorld: Geometry-Aware Monocular-to-Stereo Video Generation

## Supplementary Material

### 6. More Implementation Details.

We build our method upon Wan2.1-T2V-1.3B [48], which generates 5-second video clips at 16 FPS with a spatial resolution of 832×480. To obtain depth supervision, we employ Video Depth Anything [9] to estimate per-frame depth maps for all training videos. We further employ Stereo Any Video [24] to generate ground-truth disparity maps used for supervising the disparity during training. Each input video is represented as  $V \in \mathbb{R}^{c \times f \times h \times w}$ , where  $c = 3$ ,  $f = 81$ ,  $h = 480$ , and  $w = 832$ . The corresponding latent representation encoded by the 3D VAE is  $z \in \mathbb{R}^{c' \times f' \times h' \times w'}$ , with  $c' = 16$ ,  $f' = 21$ ,  $h' = 60$ , and  $w' = 104$ . During fine-tuning, we adopt the LoRA [20] framework with a rank of 128, using "dit" as the base model type. The LoRA adaptation targets the modules "q, k, v, o, ff0, ff2, head.head". The number of shared DiT blocks  $N$  is 20 and the number of RGB&depth DiT blocks  $L$  is 10. We train the model with a batch size of 2 and gradient accumulation steps of 2 on 8 gpus, resulting in an effective batch size of 32. The learning rate is set to  $1 \times 10^{-4}$ , setting  $\lambda_1 = \lambda_{l1} = 0.1$  and  $\lambda_{dis} = 0.5$ , and the model is trained for one epoch, totaling approximately 9k optimization steps. During temporal tiling training, the frame replacement probability  $p$  is set to 0.3 and the amount of overlapping frames is 9. Training is performed on 8 NVIDIA A800 GPUs using the AdamW optimizer [28] under bfloat16 precision. The entire training process takes approximately 11 days to complete.

### 7. More Comparisons and Cases.

We have prepared many additional comparison examples, along with more high-resolution and extended-duration video results, in our supplementary video materials. We sincerely invite the reviewers to watch them—these videos offer the clearest and most vivid demonstration of our method's capabilities.

### 8. Source code of the stereo projector

The source code of the stereo projector is provided in the accompanying code files.
